# Supplementary material
Source: publisher figshare collection journal article supplement (https://acs.figshare.com/ndownloader/files/5331094)
Supplement: Supplementary file 1 [file 5331094]

Supporting Information:

# *In Situ* Study of Evaporation Induced Surface Structure Evolution in Asymmetric Triblock Terpolymer Membranes

*Yibei Gu,<sup>†</sup> Rachel M. Dorin,<sup>†</sup> Kwan W. Tan,<sup>†</sup> Detlef-M. Smilgies,<sup>‡</sup> and Ulrich Wiesner<sup>\*†</sup>*

<sup>†</sup> Department of Materials Science and Engineering, Cornell University, Ithaca, NY 14850,  
United States

<sup>‡</sup> Cornell High Energy Synchrotron Source (CHESS), Cornell University, Ithaca, NY 14850,  
United States

[\\*ubw1@cornell.edu](mailto:*ubw1@cornell.edu)

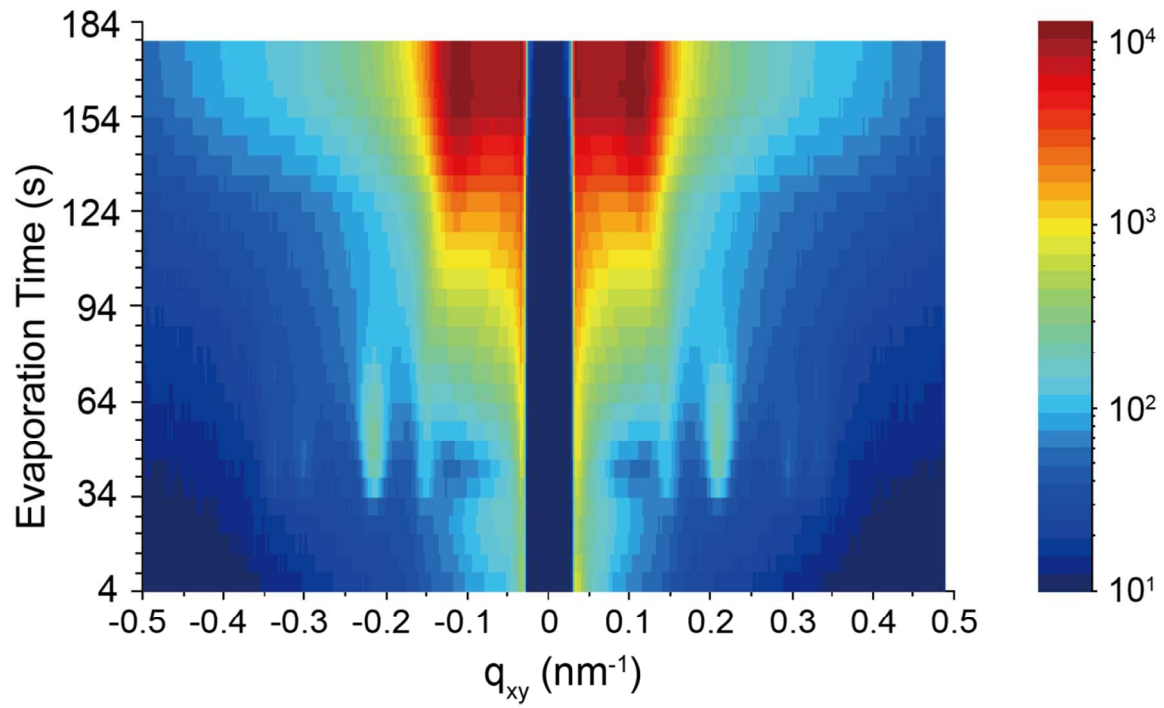

**Fig. S1** Time resolved GISAXS in plane projections of the ISV91 film from 4 s to 178 s evaporation at 6 s time intervals. Each horizontal slice is an intensity map of the in plane projections at the particular evaporation time.

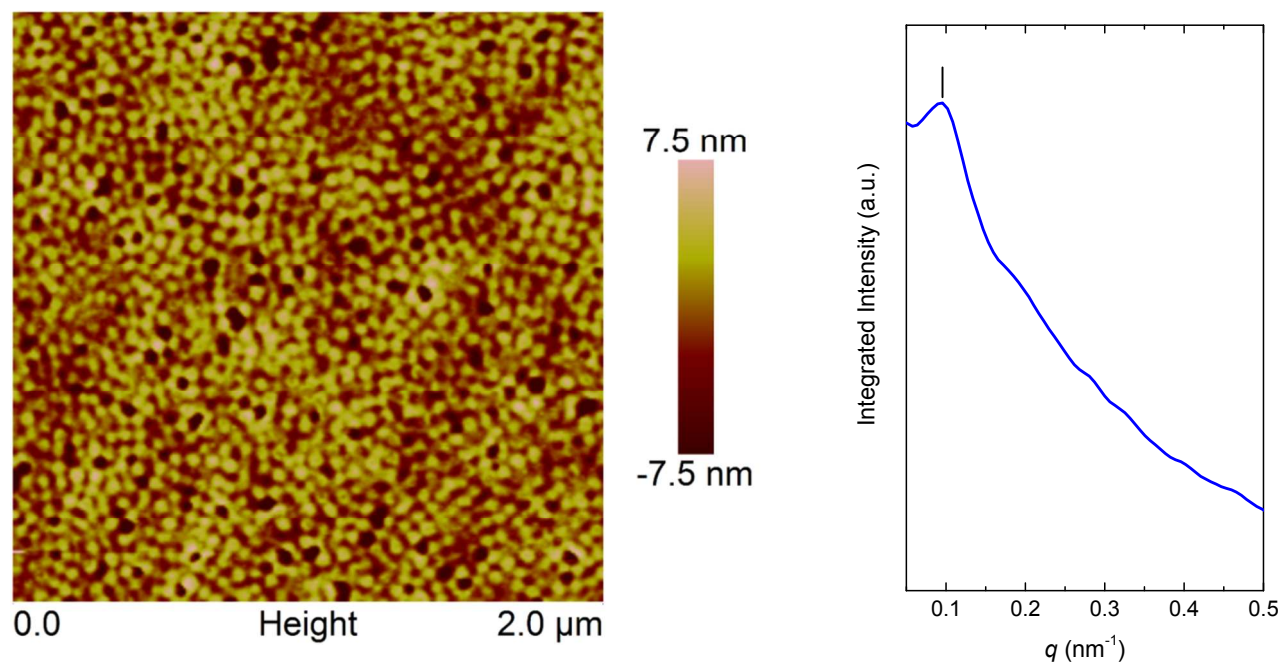

**Fig. S2.** AFM image of the dried ISV91 film (after one month drying in ambient) (left) and the corresponding FFT analysis (right) using Image J. The FFT only shows one peak with position  $q^* = 0.0957 \text{ nm}^{-1}$ . This suggests lack of long-range order in the completely dried film structure.
